# Supplementary material for: [3-11C]Pyruvate PET detects alterations in cardiac pyruvate metabolism induced by doxorubicin chemotherapy
Source: Research Square preprint supplement (doi:10.21203/rs.3.rs-7465913/v1), 2025-09-12
Supplement: Supplementary file 1 [file 48454ab039cfcafc1501c783.docx]

**SUPPLEMENTARY INFORMATION**

**[3-11C]Pyruvate PET detects alterations in cardiac pyruvate metabolism induced by doxorubicin chemotherapy**

Chul-Hee Lee1,2, Thomas Ruan2,3, Shuvra Debnath1,2, Anja S. Wacker1,2, Grace Figlioli3, John W. Babich,1,2,4,5,# Sadek Nehmeh2, Kayvan R. Keshari2,3, James M. Kelly1,2,4,5*

*1 Molecular Imaging Innovations Institute (MI3), Weill Cornell Medicine, New York, NY 10021, USA*

*2 Department of Radiology, Weill Cornell Medicine, New York, NY 10021, USA*

*3 Department of Radiology and Molecular Pharmacology Program, Memorial Sloan Kettering Cancer Center, New York, NY 10065, USA*

*4 Citigroup Biomedical Imaging Center, Weill Cornell Medicine, New York, NY 10021, USA*

*5 Sandra and Edward Meyer Cancer Center, Weill Cornell Medicine, New York, NY 10021, USA*

*# Current address: Ratio Therapeutics, Boston, MA*

**Supplemental Figures**

**
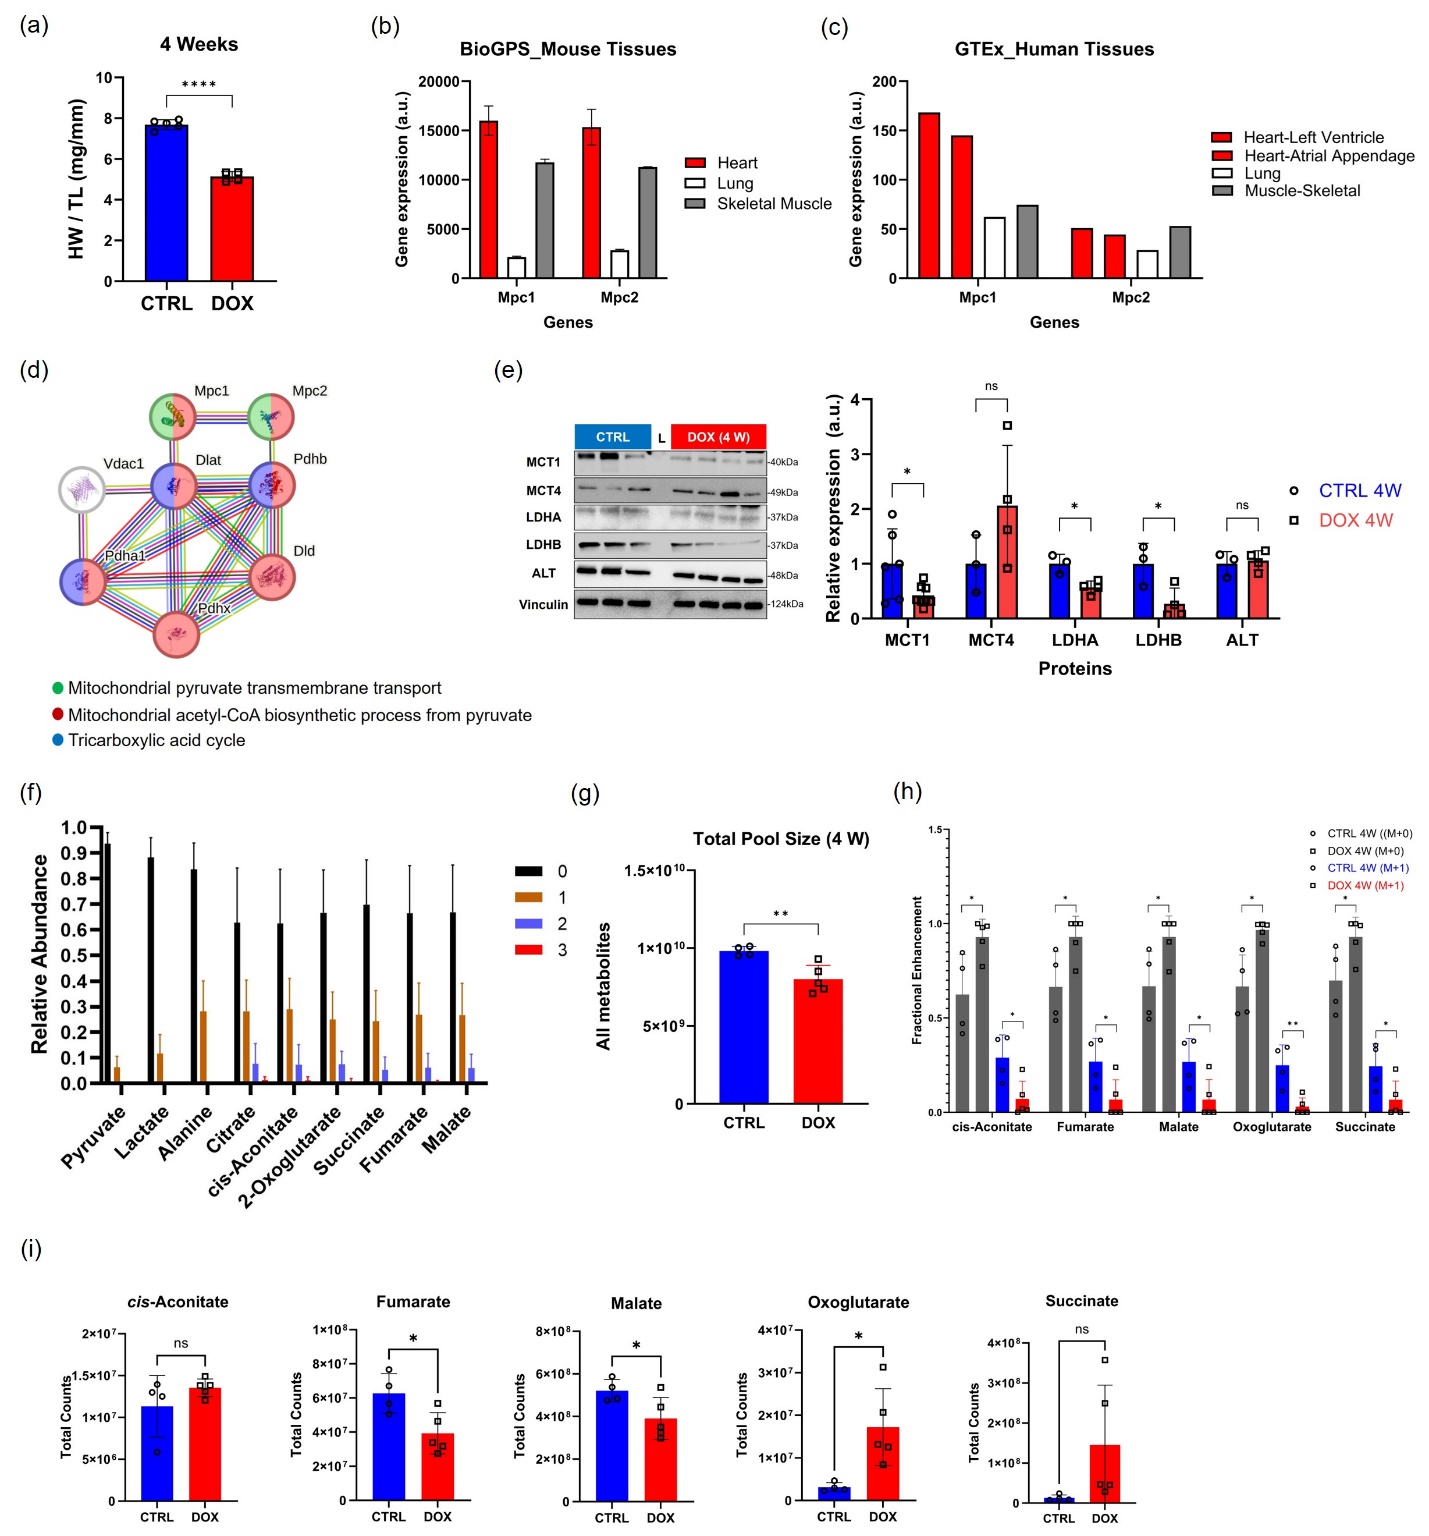
**

**Supplemental Figure 1. *DOX exposure reduces pyruvate metabolism in the mouse heart at 4 weeks.* (a)** HW/TL ratio at 4 weeks after DOX exposure. **(b)** Gene expression profiles of Mpc1 and Mpc2 in relevant mouse tissues were obtained from the BioGPS database. **(c)** Mpc1 and Mpc2 transcript levels in human tissues were obtained from the Genotype-Tissue Expression project (GTEx). Supplemental Table 3 displayed the numbers in detail. **(d)** STRING database from eight genes, including Mpc1/2 and their associated GO:BP = Acetyl-CoA biosynthetic process from pyruvate. **(e)** Western blot analysis of cardiac MCT1, MCT4, LDHA, LDHB, and ALT expression in the 4-week group. Vinculin was used as a reference. ROI quantification of each protein level was performed using ImageJ. **(f)** Incorporation of multiple isotopic labels into TCA cycle intermediates by 13C in healthy mouse hearts. **(g)** Comparison of the total metabolite pool size in the mice exposed to DOX with CTRL. **(h)** M+0 and M+1 fractional enrichments of other TCA cycle intermediates, including aconitate, fumarate, malate, oxoglutarate, and succinate. **(i)** Total pool size of cis-aconitate, fumarate, malate, oxoglutarate, and succinate in cardiac tissue collected at 4 W. Data are presented as the mean ± s.d. * *p* < 0.05; ** *p* < 0.01. Statistical analysis was performed using an unpaired t-test (a, g), multiple unpaired t-tests (e), or two-way ANOVA (h). HW/TL = heart weight-to-tibia length; MPC = mitochondrial pyruvate carrier; DOX = doxorubicin; CTRL = control; GO:BP = gene ontology:biological process; STRING = Search Tool for the Retrieval of Interacting Genes/Proteins; MCT = monocarboxylate transporter; LDH = lactate dehydrogenase; ALT = alanine aminotransferase. TCA = tricarboxylic acid;


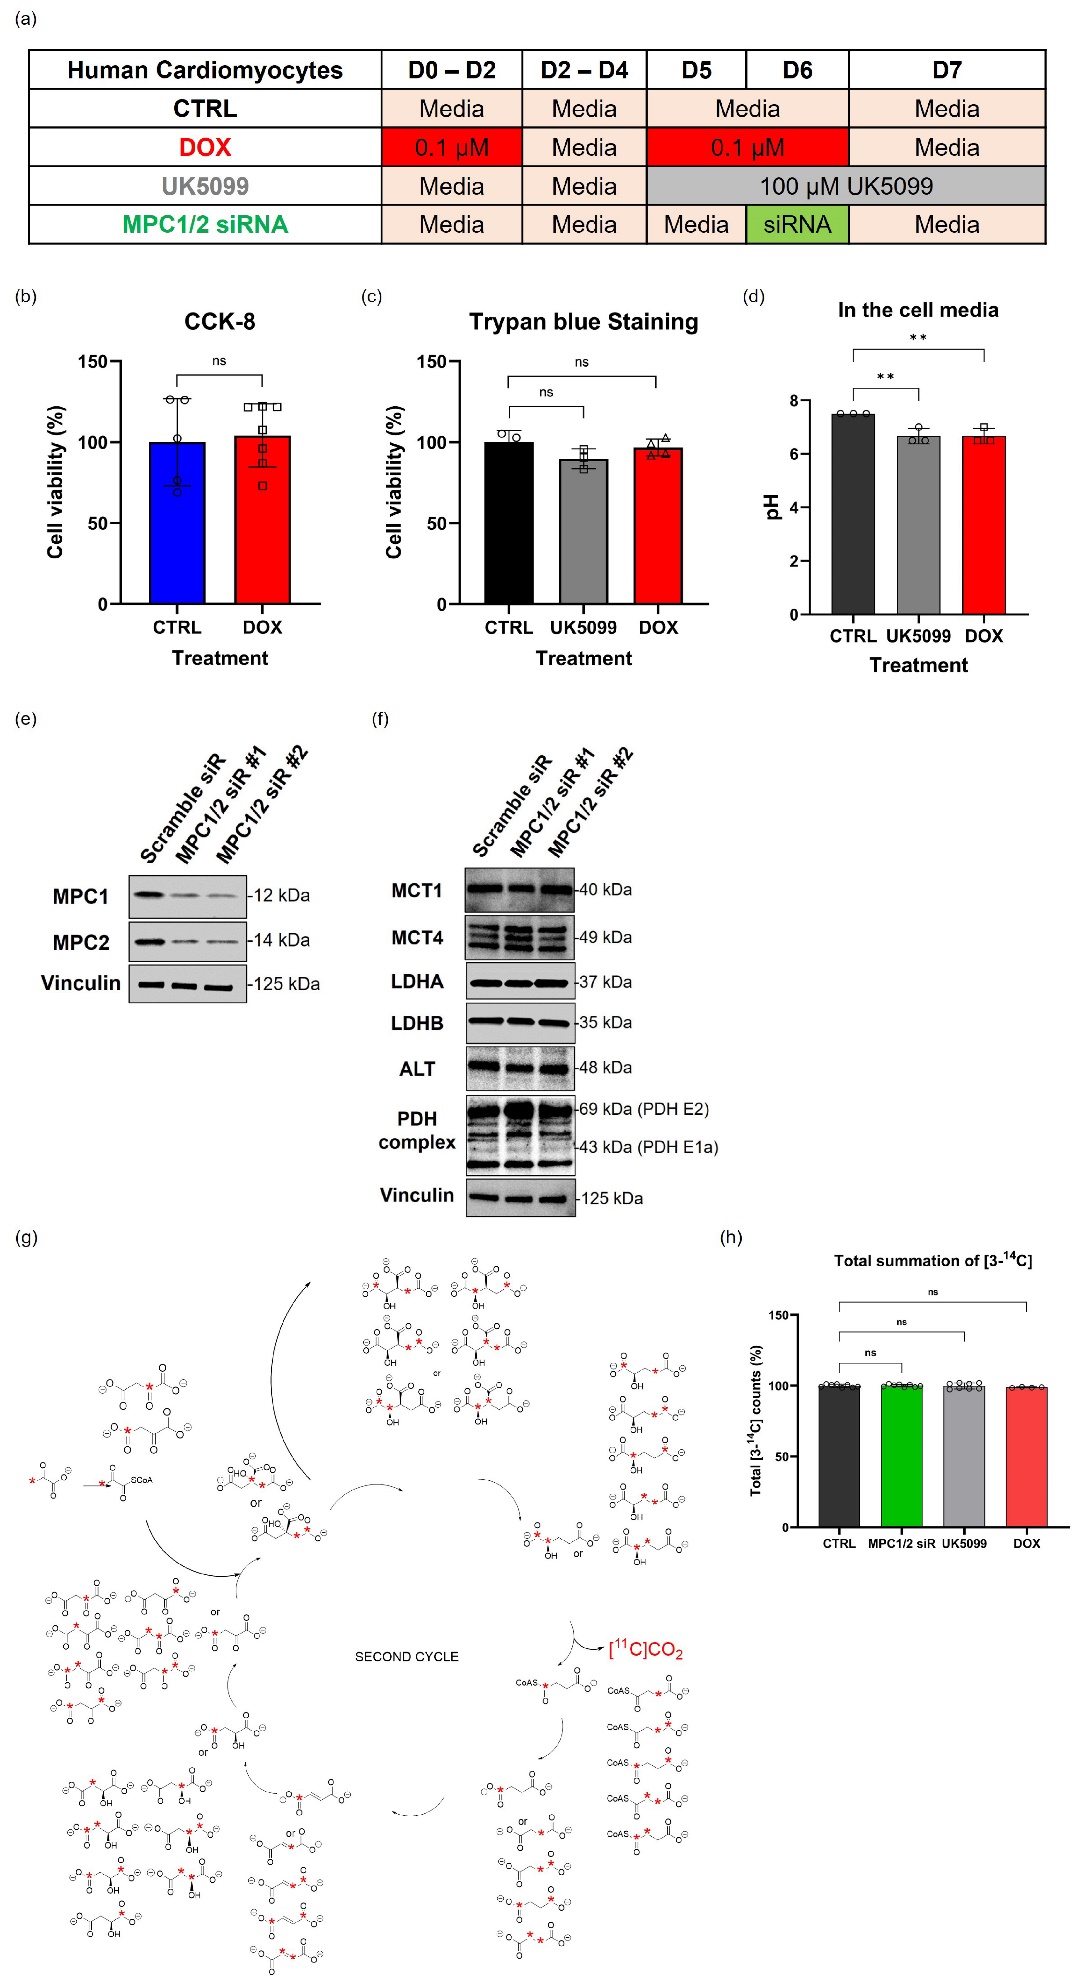


**Supplemental Figure 2. *DOX exposure impairs pyruvate uptake by downregulating MPC1/2 in HCM.* (a)** *In vitro* study design: HCMs were plated and assigned to control groups (vehicle or scramble siRNA) or experimental groups (DOX, UK5099, and MPC1/2 siRNA). Group conditions were optimized based on established protocol methods. **(b)** Cell viability according to DOX treatment was determined by the CCK-8 assay that detects the metabolic activity of cells. **(c)** Cell viability according to DOX or UK5099 treatment was determined by Trypan blue staining that detects the permeability of cell membranes from each of the cells. **(d)** The supernatant (cell media) from each group of cells treated according to the methods in Supplemental Fig. 2a was collected, and its pH was measured using pH-Test indicator strips to confirm lactate production. **(e)** Western blot analysis of MPC1/2 expression in HCMs treated with siRNA. #1 and #2 mean the different lipofectamine conditions. Vinculin was used as a reference. **(f)** Western blot analysis of MCT1, MCT4, LDHA, LDHB, ALT, and PDH complex expression in HCMs treated with siRNA. Vinculin was used as a reference. **(g)** Incorporation of 13C label into selected metabolites extracted from the hearts of healthy C57BL/6J mice administered [3-13C]pyruvate. Hearts were excised 10 min p.i. Colored bars represent the number of 13C labels per molecule and error bars represent standard deviations. **(h)** The total 14C counts of each group of cells, representing the sum of the [14C]CO2 captured, the cell-associated activity, and the remaining activity in the media. Data are presented as the mean ± s.d. * *p* < 0.05; ** *p* < 0.01. Statistical analysis was performed using unpaired t-tests (b) or one-way ANOVA (c, d, and h). HCM = human cardiomyocytes; PDH = pyruvate dehydrogenase.


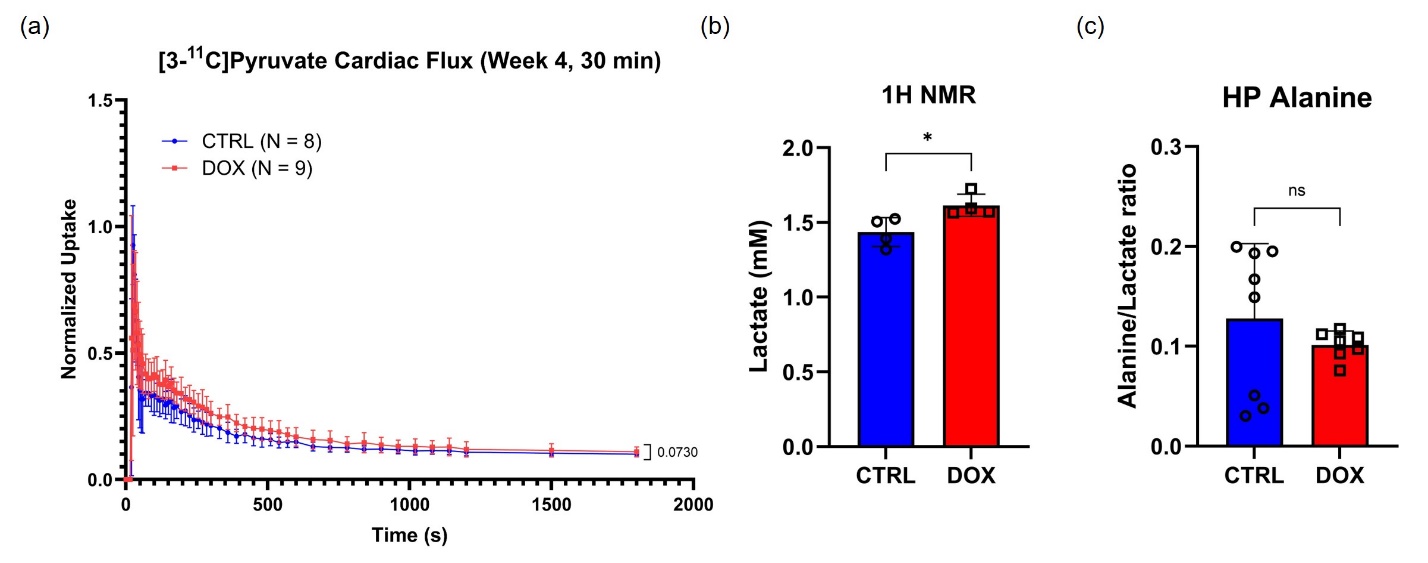


**Supplemental Figure 3. *[3-11C]Pyruvate PET detects DOX-induced changes in cardiac pyruvate flux at 4 weeks.* (a)**Dynamic PET images during 30 minutes upon intravenous administration of [3-11C]pyruvate. **(b)** Lactate pool in cardiac tissues from mice in the DOX group compared to the control group. 1H NMR spectra of metabolite extract samples were acquired in a 14.1T spectrometer. Spectra were processed, and metabolite peaks were quantified with NMR software. **(c)** The alanine/lactate ratio from [1-13C] pyruvate MRI. Different colors within each group represent 3–4 independent measurements per mouse. Data are presented as the mean ± s.d. * p < 0.05. Statistical analysis was performed using unpaired t-tests (a-c). NMR = Nuclear Magnetic Resonance; HP = Hyperpolarized.

**
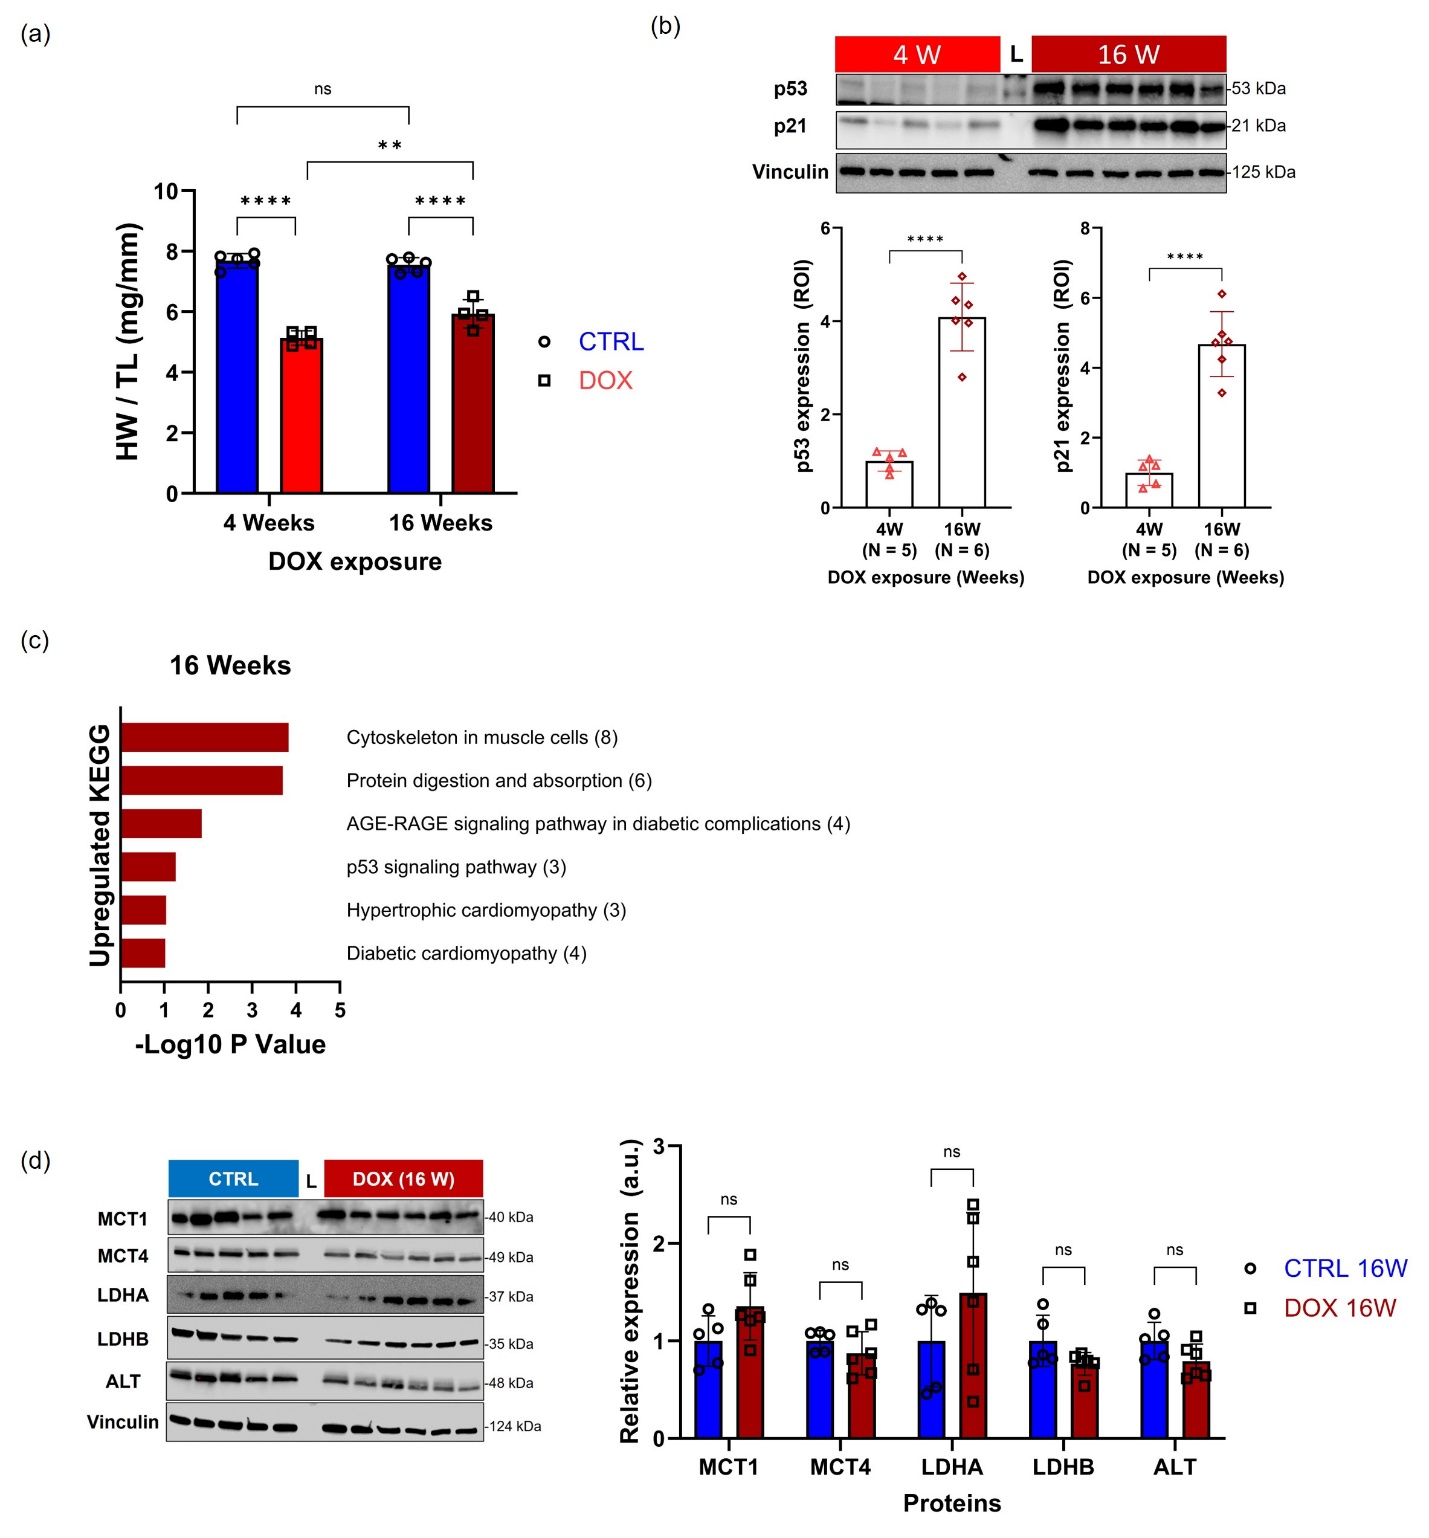
**

**Supplemental Figure 4. *Recovery of MPC1/2 expression is associated with accelerated cardiac growth.* (a)** HW/TL ratio in 4 and 16 weeks after DOX exposure. This graph was reorganized using the Supplementary Fig. 1a and Fig. 4a. **(b)** Western blot analysis of cardiac p53 and p21 expression in the 16-week group. Vinculin was used as a reference. ROI quantification of each protein level was performed using ImageJ. **(c)** Significantly upregulated selected-KEGG pathways at 16 weeks after DOX exposure. Parentheses of (c) indicate the number of identified genes of each KEGG pathway. **(d)** Western blot analysis of cardiac MCT1, MCT4, LDHA, LDHB, and ALT expression in the 16-week group. Vinculin was used as a reference. ROI quantification of each protein level was performed using ImageJ. Data are presented as the mean ± s.d. ** *p* < 0.01 and **** *p* < 0.0001. Statistical analysis was performed using two-way ANOVA (a), unpaired t-test (b), or multiple unpaired t-tests (d). HW/TL = heart weight-to-tibia length; KEGG = Kyoto Encyclopedia of Genes and Genomes; MCT = monocarboxylate transporter; LDH = lactate dehydrogenase; ALT = alanine aminotransferase.


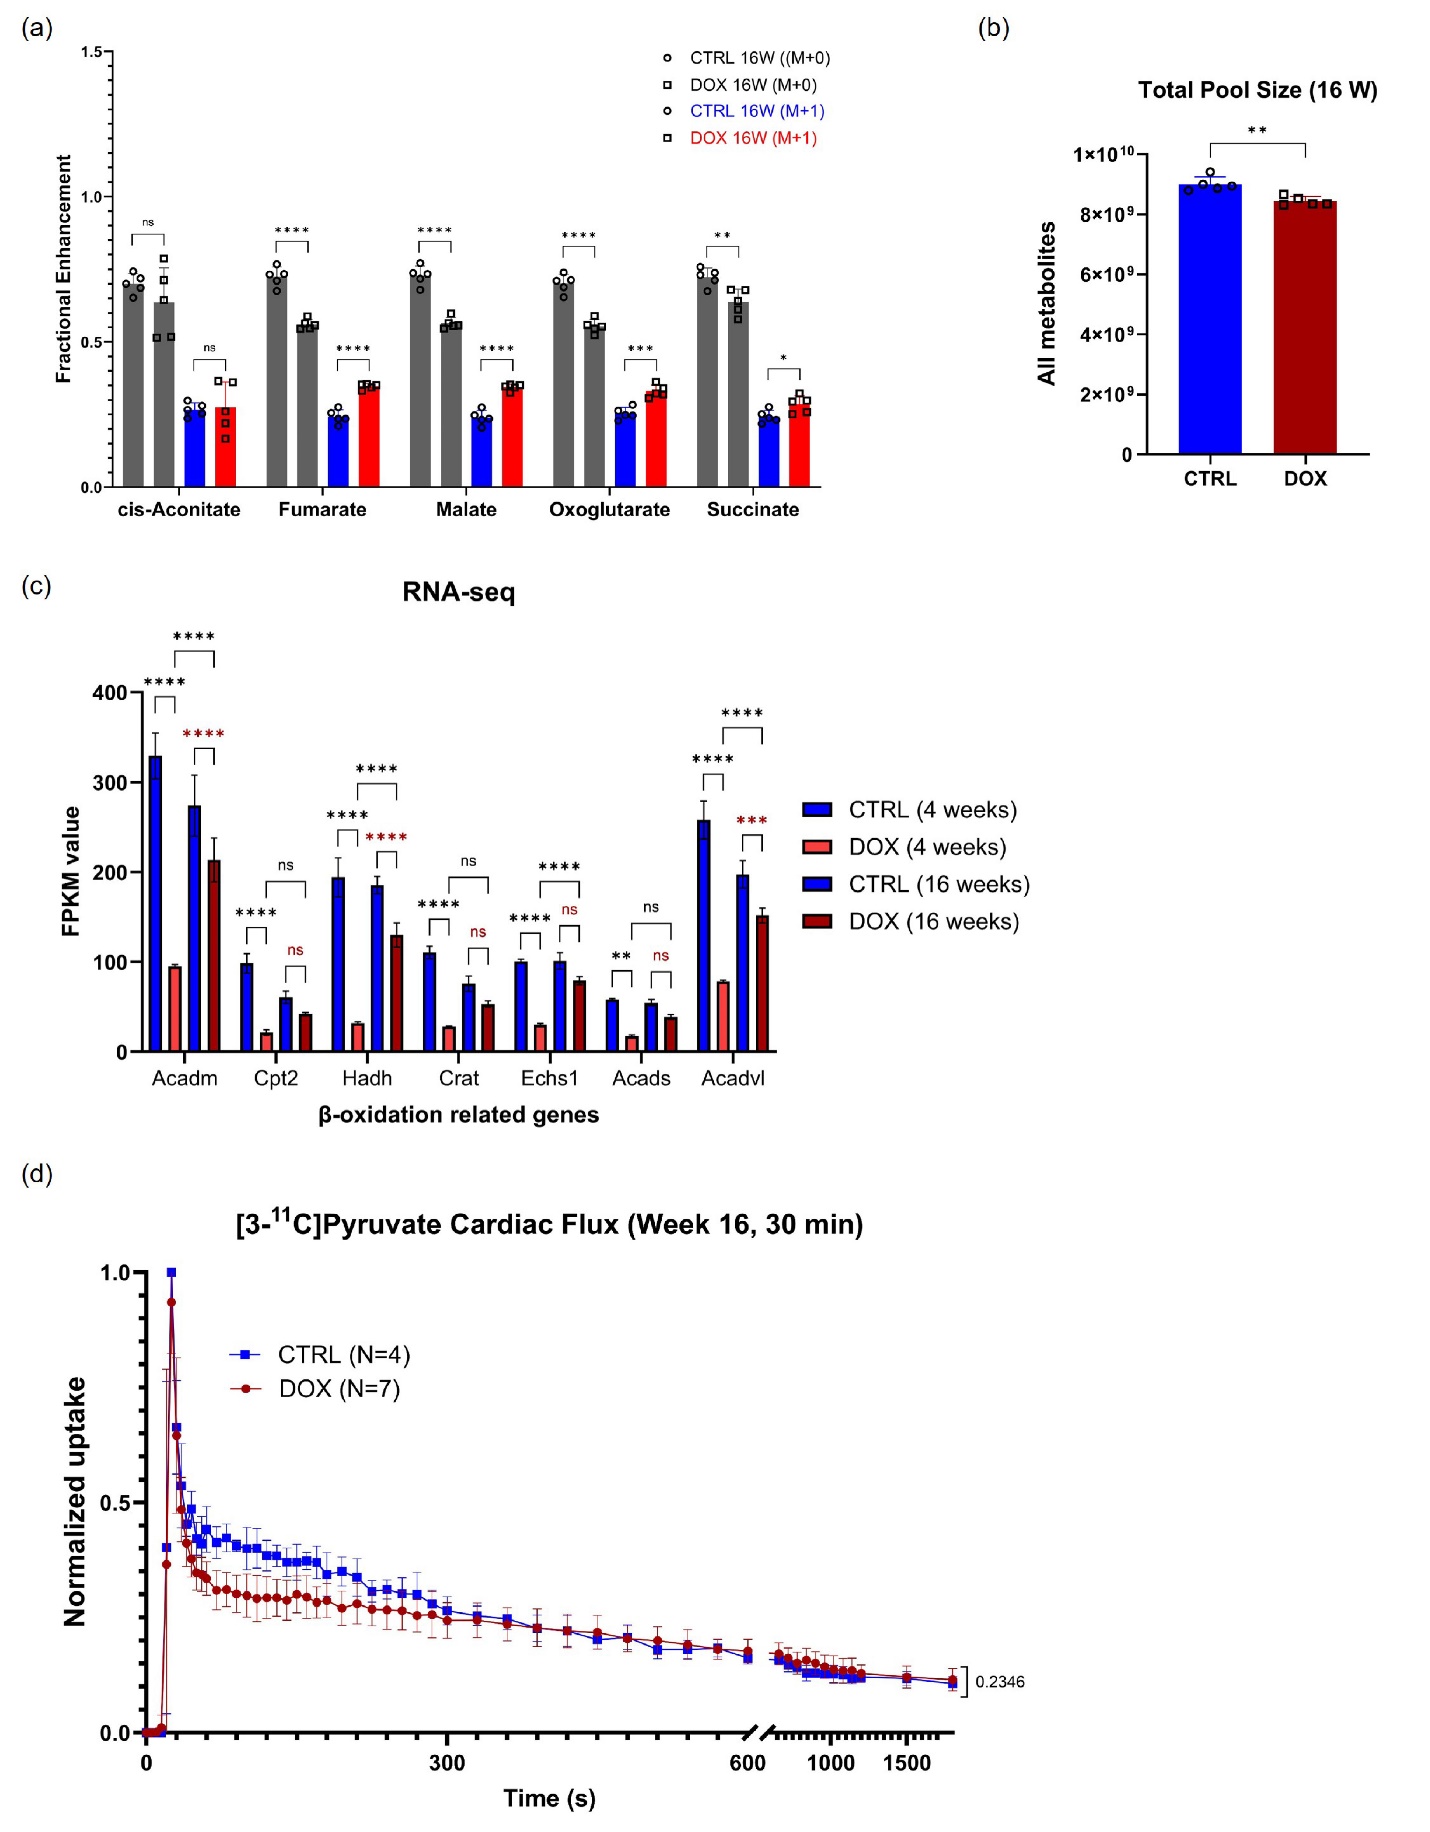


**Supplemental Figure 5. *Comparison between changes observed in [3-11C]pyruvate PET imaging and shifts in pyruvate metabolism and β-oxidation components.* (a)** M+0 and M+1 fractional enrichments of other TCA cycle intermediates, including aconitate, fumarate, malate, oxoglutarate, and succinate at 16 weeks. (**b)** Comparison of the total metabolite pool size in the mice exposed to DOX with CTRL at 16 weeks. **(c)** Genes encoding key β-oxidation proteins were analyzed using RNA-seq-derived FPKM values from 4- and 16-week groups. **(d)** Dynamic PET images during 30 minutes upon intravenous administration of [3-11C]pyruvate at 16 weeks. Data are presented as the mean ± s.d. ** *p* < 0.01; *** *p* < 0.001; **** *p* < 0.0001. Statistical analysis was performed using two-way ANOVA (a, c), or an unpaired t-test (b, d). FPKM = Fragments Per Kilobase of exon per Million mapped fragments.

**
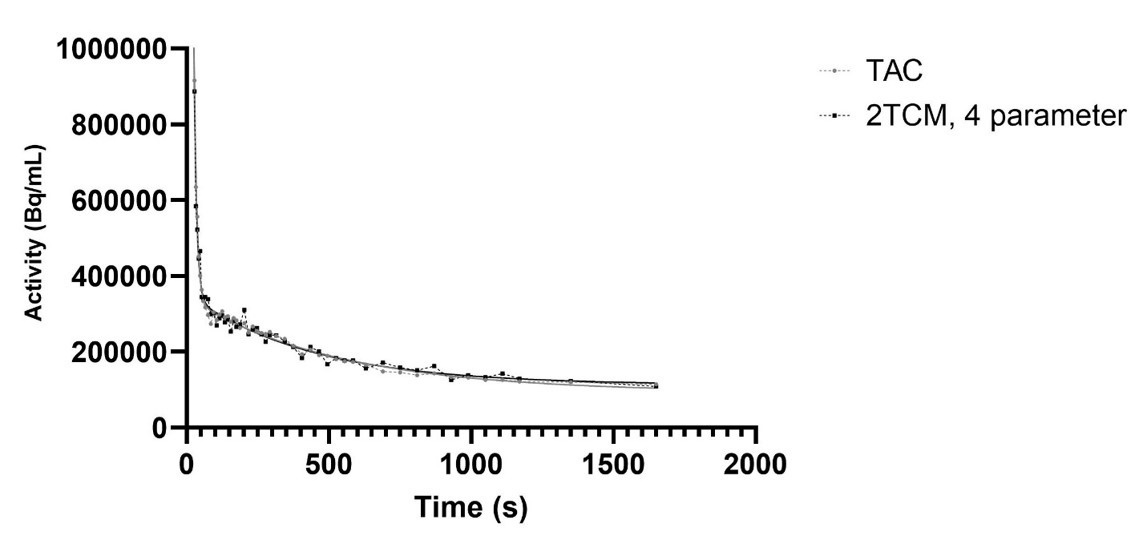
**

**Supplemental Figure 6.** Representative fit of the 2 tissue, 4 compartment model describing cardiac carbon-11 flux following intravenous administration of [3-11C]pyruvate. Compartmental modeling was performed using Carimas. Lines of best fit are shown in bold with the data curves depicted with a dashed line.

**Supplemental Tables**

**Supplemental Table 1.** KEGG pathways by downregulated genes from the bulk RNA sequencing between CTRL and DOX of 4-week groups

| **KEGG_PATHWAY**  **(DOWN)** | **Term** | **Count** | **PValue** | **Genes** |
| --- | --- | --- | --- | --- |
| mmu01100 | Metabolic pathways | 241 | 7.1E-44 | PANK1, ENO3, GCSH, NAMPT, CHAC2, MLYCD, MMUT, ATP6V1E1, SEPHS2, MCCC2, PDHX, GSTK1, ACSL1, ENTPD5, OXSM, CMBL, ASRGL1, MTAP, ETHE1, HMBS, ACOT2, UQCRC1, ACOT1, SUCLG2, SUCLG1, LAP3, UQCRC2, ALG10B, LIPT2, HACD1, MGST3, PLA2G5, LDHB, LDHA, INPP5A, FDFT1, ST3GAL3, GSTM2, ACADSB, PRDX6, PAICS, CS, UCK2, ALDH6A1, ADI1, KYAT3, PDE3A, OGDH, ECHDC1, PPT2, GSTM7, GSTM5, PYGB, COX7B, HIBADH, GBE1, TECR, PIGP, ADK, HCCS, PYGM, GPT, PIGW, COX7C, GYS1, MCEE, ACADL, GUK1, IMPA2, SMPD1, RFK, ACADM, DLAT, ACADS, COX8A, COX8B, PCYT1A, TPI1, GSTO1, PGAM2, PLAAT3, HADHB, HADHA, ALDH5A1, BDH1, IVD, ADSSL1, L2HGDH, ALDOB, ALDOA, DLD, ECHS1, PRUNE1, DLST, HSD17B4, UQCR10, COX5B, HSD17B7, COX5A, SC5D, GPAT3, CBR4, NQO1, TIGAR, MDH1, CKM, MDH2, ATP5PB, PTGES2, GATC, COX6C, DHRS4, ALDH4A1, GPAM, NDUFAB1, ACAA2, NDUFA11, NDUFA12, NDUFA10, CPOX, HNMT, COX6A2, LCLAT1, ENPP4, KMT5A, HADH, DGAT2, SDHC, ACYP2, SDHD, SDHA, SDHB, COX6B1, PHOSPHO2, PGP, SMS, NDUFB10, UQCRB, NDUFB11, GLO1, AK1, GMPS, COX7A2, AK4, COX7A1, UQCRH, ACAT1, ESD, PGK1, COX11, SMYD1, CYC1, NDUFV3, NDUFV2, ATP6V1D, COX10, MPST, PDHA1, GOT1, EPHX2, IDH1, IDH2, GOT2, CRLS1, COQ5, QDPR, COQ3, AMACR, UQCRQ, CYCS, ACO2, NIT2, ACADVL, ALAS1, COX4I1, APIP, HK2, NADK2, GYG, DBT, ME1, IDH3B, UQCRFS1, ME3, HIBCH, PGM1, IDH3A, BCKDHA, PLA2G12A, GPX4, HMGCS1, BCKDHB, SORD, NDUFC2, NDUFC1, FH1, NDUFS8, PKM, ACOX1, NDUFS6, NDUFS5, EHHADH, CAT, NDUFS4, PCCB, NDUFS2, NDUFS1, GAPDH, DCTPP1, FBP2, NDUFB9, NDUFB8, NDUFB6, CARNMT1, NDUFB5, NDUFB4, NDUFB3, PDHB, HSD17B10, AGPAT3, CKMT2, UGP2, OXCT1, BPNT2, ACSS1, NDUFA9, NDUFA8, NDUFA7, DUT, FAHD1, IDH3G, NDUFA4, MMAB, NDUFA3, NDUFA1, SUOX, SUCLA2, NT5C1A, CHPT1, LPIN1, PFKM |
| mmu05415 | Diabetic cardiomyopathy | 76 | 1.3E-37 | RYR2, COX7B, NDUFA11, NDUFA12, COX4I1, NDUFA10, ATP2A2, SLC2A4, COX6A2, COX7C, PPP1CB, GYS1, CPT2, MPC1, MPC2, UQCRFS1, CD36, CTSD, PDK2, COX8A, COX8B, NDUFC2, SDHC, NDUFC1, SDHD, SDHA, SDHB, AGTR1A, COX6B1, NDUFS8, NDUFS6, NDUFS5, NDUFS4, UQCRC1, PPIF, VDAC2, NDUFS2, VDAC1, NDUFS1, UQCRC2, SLC25A5, SLC25A4, GAPDH, NDUFB9, NDUFB8, NDUFB6, UQCRB, NDUFB10, NDUFB11, NDUFB5, NDUFB4, NDUFB3, COX7A2, PDHB, UQCR10, COX5B, COX5A, COX7A1, UQCRH, PLN, TNNI3, CYC1, NDUFV3, NDUFV2, NDUFA9, NDUFA8, NDUFA7, PDHA1, ATP5PB, NDUFA4, NDUFA3, NDUFA1, COX6C, AGT, UQCRQ, NDUFAB1 |
| mmu00190 | Oxidative phosphorylation | 60 | 1.4E-35 | COX7B, NDUFA11, NDUFA12, COX4I1, NDUFA10, COX6A2, COX7C, UQCRFS1, ATP6V1E1, COX8A, COX8B, NDUFC2, SDHC, NDUFC1, SDHD, SDHA, SDHB, COX6B1, NDUFS8, PPA2, PPA1, NDUFS6, NDUFS5, NDUFS4, UQCRC1, NDUFS2, NDUFS1, UQCRC2, NDUFB9, NDUFB8, NDUFB6, UQCRB, NDUFB10, NDUFB11, NDUFB5, NDUFB4, NDUFB3, COX7A2, UQCR10, COX5B, COX5A, COX7A1, UQCRH, COX11, CYC1, NDUFV3, NDUFV2, ATP6V1D, COX10, NDUFA9, NDUFA8, NDUFA7, ATP5PB, NDUFA4, NDUFA3, NDUFA1, COX6C, UQCRQ, NDUFAB1, CYCS |
| mmu01200 | Carbon metabolism | 53 | 5.3E-31 | GPT, ENO3, HK2, GCSH, MCEE, ME1, IDH3B, ME3, MMUT, DLAT, ACADS, HIBCH, IDH3A, TPI1, PGAM2, SDHC, SDHD, SDHA, SDHB, FH1, PKM, ACOX1, CAT, PCCB, PGP, SUCLG2, SUCLG1, ALDOB, ALDOA, DLD, GAPDH, FBP2, ECHS1, DLST, PDHB, ACAT1, ESD, PGK1, ACSS1, PDHA1, MDH1, GOT1, MDH2, IDH3G, IDH1, IDH2, GOT2, CS, ALDH6A1, SUCLA2, OGDH, ACO2, PFKM |
| mmu05208 | Chemical carcinogenesis - reactive oxygen species | 68 | 9.7E-29 | COX7B, NDUFA11, NDUFA12, COX4I1, NDUFA10, COX6A2, COX7C, AS3MT, UQCRFS1, COX8A, COX8B, GSTO1, NDUFC2, SDHC, NDUFC1, SDHD, SDHA, SDHB, COX6B1, NDUFS8, NDUFS6, NDUFS5, CAT, NDUFS4, UQCRC1, PPIF, VDAC2, NDUFS2, VDAC1, NDUFS1, UQCRC2, SLC25A5, SLC25A4, NDUFB9, NDUFB8, NDUFB6, UQCRB, NDUFB10, NDUFB11, NDUFB5, MGST3, NDUFB4, NDUFB3, COX7A2, UQCR10, COX5B, COX5A, COX7A1, UQCRH, CYC1, NDUFV3, NDUFV2, NDUFA9, NDUFA8, NQO1, GSTM2, NDUFA7, ATP5PB, NDUFA4, EPHX2, NDUFA3, NDUFA1, SOD2, COX6C, UQCRQ, NDUFAB1, GSTM7, GSTM5 |
| mmu04260 | Cardiac muscle contraction | 37 | 4.2E-21 | RYR2, COX7B, UQCRB, COX4I1, ATP2A2, COX7A2, ATP1A1, UQCR10, COX5B, COX7A1, COX7C, COX5A, COX6A2, UQCRH, SLC8A1, CACNG6, UQCRFS1, TNNI3, CACNA1S, CYC1, COX8A, COX8B, CACNA2D1, TNNC1, TPM1, COX6C, ATP1B1, TRDN, COX6B1, ACTC1, UQCRQ, MYL2, MYL3, UQCRC1, CASQ2, HRC, UQCRC2 |
| mmu00020 | Citrate cycle (TCA cycle) | 23 | 1.0E-19 | PDHA1, MDH1, MDH2, IDH3G, IDH1, IDH2, DLST, SDHC, PDHB, SDHD, SDHA, SDHB, FH1, CS, SUCLA2, OGDH, IDH3B, SUCLG2, SUCLG1, ACO2, DLAT, DLD, IDH3A |
| mmu00280 | Valine, leucine and isoleucine degradation | 25 | 1.2E-14 | ECHS1, ACAA2, HIBADH, HSD17B10, ACAT1, MCEE, OXCT1, DBT, ACADM, MMUT, HADH, ACADS, HIBCH, BCKDHA, MCCC2, HMGCS1, BCKDHB, ACADSB, HADHB, HADHA, ALDH6A1, EHHADH, IVD, PCCB, DLD |
| mmu01212 | Fatty acid metabolism | 21 | 5.9E-10 | ACADVL, HACD1, ECHS1, ACAA2, ACSL1, OXSM, TECR, HSD17B4, ACADSB, ACAT1, HADHB, HADHA, CPT2, ACADL, ACOX1, EHHADH, ACADM, PPT2, HADH, ACADS, CBR4 |
| mmu00620 | Pyruvate metabolism | 16 | 3.7E-08 | PDHA1, MDH1, MDH2, GLO1, ACYP2, PDHB, FH1, ACAT1, LDHB, LDHA, PKM, ME1, ME3, DLAT, ACSS1, DLD |

**Supplemental Table 2.** GO:BPs analysis by downregulated genes from the bulk RNA sequencing between CTRL and DOX of 4-week groups

| **GO:BP (DOWN)** | **Term** | **Count** | **PValue** | **Genes** |
| --- | --- | --- | --- | --- |
| GO:0032543 | Mitochondrial translation | 51 | 3.4E-39 | MRPS16, MRPS14, FASTKD2, MRPS12, MRPL39, MRPL36, MRPL34, MRPL35, MRPL32, MRPL41, MRPL4, MRPL42, MRPL2, MRPL1, MRPL9, CHCHD1, MRPS27, MRPS24, MRPS22, MRPS23, MRPL49, MRPS2, MRPS21, MRPL45, MRPS7, MRPL46, MRPL43, MRPL44, MRPS18C, MRPL50, MRPL51, NOA1, MRPS35, MRPL18, MRPL19, MRPS31, MRPL16, MRPL14, MRPL12, MRPL57, MRPL13, MRPL10, MRPL54, MRPL55, MRPL11, NDUFA7, GATC, MRPL28, MRPL21, MRPL22, MRPL30 |
| GO:0032981 | Mitochondrial respiratory chain complex I assembly | 35 | 6.3E-27 | NDUFB9, NDUFB8, DMAC1, NDUFA11, NDUFB10, NDUFB6, NDUFB11, NDUFA12, NDUFB5, NDUFB4, NDUFA10, NDUFB3, NDUFB1, AIFM1, NDUFA9, NDUFA8, NDUFA3, NDUFA1, NDUFC2, NDUFC1, TIMM21, BCS1L, OXA1L, LYRM2, NDUFS8, NDUFS6, NDUFS5, NDUFAF4, NDUFS4, NDUFAB1, TMEM126A, NDUFS2, NDUFS1, NDUFAF1, TMEM126B |
| GO:0009060 | Aerobic respiration | 36 | 8.5E-27 | NDUFB9, NDUFB8, NDUFA11, NDUFB10, NDUFB6, NDUFB11, NDUFA12, NDUFB5, NDUFB4, NDUFA10, NDUFB3, NDUFB1, MTFR1L, NDUFV3, NDUFV2, COX10, NDUFA9, NDUFA8, NDUFA7, MDH2, NDUFA3, NDUFA1, NDUFC2, NDUFC1, SDHB, OXA1L, NDUFS8, NDUFS6, NDUFS5, CAT, NDUFS4, NDUFAB1, NDUFS2, MTFR1, NDUFS1, FXN |
| GO:0042776 | Mitochondrial ATP synthesis coupled proton transport | 33 | 6.8E-25 | NDUFB9, NDUFB8, NDUFA11, NDUFB10, NDUFB6, NDUFB11, NDUFA12, NDUFB5, NDUFB4, NDUFA10, NDUFB3, NDUFB1, NDUFV3, NDUFV2, NDUFA9, NDUFA8, NDUFA7, ATP5PB, NDUFA3, NDUFA1, NDUFC2, SDHC, NDUFC1, SDHD, SDHA, SDHB, NDUFS8, NDUFS6, NDUFS5, NDUFS4, NDUFAB1, NDUFS2, NDUFS1 |
| GO:0006099 | Tricarboxylic acid cycle | 24 | 8.1E-22 | PDHA1, MDH1, MDH2, MRPS36, IDH3G, IDH1, IDH2, DLST, SDHC, PDHB, SDHD, SDHA, SDHB, FH1, CS, SUCLA2, NDUFS4, OGDH, IDH3B, SUCLG2, SUCLG1, ACO2, DLAT, IDH3A |
| GO:0006631 | Fatty acid metabolic process | 48 | 9.9E-19 | ACADVL, HACD1, PRKAA2, ECHS1, ACAA2, ECI1, TECR, HSD17B4, LPL, DBI, ABHD5, PLA2G5, ALKBH7, HSD17B10, ACAT1, CPT2, ACADL, UCP3, THEM4, CD36, ACADM, MLYCD, HADH, ACAD11, ACADS, CBR4, DECR1, LYPLA1, ACSL1, PTGES2, PNPLA8, OXSM, ECH1, ACADSB, ACSF2, HADHB, GNPAT, HADHA, AMACR, GPAM, ACOX1, NDUFS6, EHHADH, NDUFAB1, ACOT2, ACOT1, ECHDC3, CRAT |
| GO:0006120 | Mitochondrial electron transport, NADH to ubiquinone | 17 | 7.0E-15 | NDUFB9, NDUFA8, NDUFB8, NDUFA7, NDUFB6, BDNF, NDUFA10, NDUFC2, COQ9, DNAJC15, NDUFS8, NDUFS6, NDUFS2, NDUFS1, NDUFAF1, NDUFV2, DLD |
| GO:0006629 | Lipid metabolic process | 89 | 5.3E-14 | RAB7, ACADVL, LPGAT1, ACAA2, ECI1, TECR, HDLBP, VLDLR, LCLAT1, LACTB, AKR7A5, CPT2, ACADL, SMPD1, ACADM, MLYCD, HADH, ACAD11, ACADS, PLA2G12A, LYPLA1, DGAT2, PCYT1A, HMGCS1, GPX4, ACSL1, OXSM, BCKDHB, ECH1, PLAAT1, ACOT13, PLAAT3, PTGR2, HADHB, HADHA, BDH1, ACOX1, EHHADH, ACOT2, ACOT1, PLBD1, PLIN5, HACD1, PRKAA2, ECHS1, RETSAT, INSIG2, MGST3, HSD17B4, LPL, FITM1, FITM2, ABHD5, PLA2G5, HSD17B7, HSD17B10, AGPAT3, ACAT1, OXCT1, THEM4, SC5D, RDH14, GPAT3, SPTSSA, ACSS1, CBR4, COX10, DECR1, FDFT1, GSTM2, SLC16A1, PTGES2, PNPLA8, ADHFE1, EPHX2, CIDEA, CRLS1, ACADSB, PRDX6, ACSF2, NCEH1, GPAM, LPCAT3, NDUFAB1, ECHDC3, CHPT1, LPIN1, CRAT, NFE2L1 |
| GO:0007005 | Mitochondrion organization | 24 | 1.2E-08 | EPM2A, RAB3A, PTCD2, MTFP1, MTX2, CHCHD10, PHB, BCS1L, SOD2, PHB2, HSD17B10, NIPSNAP2, PRDX3, PINK1, CHCHD2, OPA1, NOA1, DNAJA3, MFN2, MTFR1, TMEM126B, FXN, COX10, SLC25A46 |
| GO:0006086 | Acetyl-CoA biosynthetic process from pyruvate | 8 | 3.1E-08 | PDHX, PDHA1, MPC1, MPC2, VDAC1, PDHB, DLAT, DLD |

**Supplemental Table 3.** Bulk tissue gene expression in humans for Mpc1 (ENSG00000060762.19) and Mpc2 (ENSG00000143158.11). The data source was determined by GTEx Analysis Release V10 (dbGaP Accession phs000424.v10.p2) (TPM; Transcripts Per Million).

|  | Mpc1  (median TPM) | Mpc2  (median TPM) |
| --- | --- | --- |
| Heart-Left Ventricle (n = 452) | 168.3 | 50.95 |
| Heart-Atrial Appendage (n = 461) | 145.0 | 44.37 |
| Lung (n = 604) | 62.18 | 28.51 |
| Muscle-Skeletal (n = 818) | 74.63 | 53.09 |

**Supplemental Table 4.** Observation of protein interaction using the STRING database from genes that consist of GO:BP (acetyl-CoA biosynthetic process from pyruvate)

| **#Term ID** | **Term description** | **Strength** | **False Discovery Rate (FDR)** | **Matching proteins**  **(Interesting targets)** |
| --- | --- | --- | --- | --- |
| GO:0006850 | Mitochondrial pyruvate transmembrane transport | 3.44 | 2.0E-04 | Mpc2, Mpc1 |
| GO:0061732 | Mitochondrial acetyl-CoA biosynthetic process from pyruvate | 3.38 | 1.7E-18 | Pdhx, Pdhb, Mpc2, Pdha1, Dlat, Dld, Mpc1 |
| GO:0006099 | Tricarboxylic acid cycle | 2.39 | 7.3E-05 | Pdhb, Pdha1, Dlat |
| GO:1990542 | Mitochondrial transmembrane transport | 1.98 | 9.1E-04 | Mpc2, Vdac1, Mpc1 |
| GO:0009060 | Aerobic respiration | 1.81 | 7.7E-05 | Pdhb, Pdha1, Dlat, Dld |
| GO:0006006 | Glucose metabolic process | 1.80 | 2.8E-03 | Pdhb, Pdha1, Dlat |
| GO:0098656 | Anion transmembrane transport | 1.37 | 4.9E-02 | Mpc2, Vdac1, Mpc1 |

**Supplemental Table 5.** KEGG pathways by upregulated genes from the bulk RNA sequencing between CTRL and DOX of 16-week groups

| **KEGG_PATHWAY**  **(UP)** | **Term** | **Count** | **PValue** | **Genes** |
| --- | --- | --- | --- | --- |
| mmu04820 | Cytoskeleton in muscle cells | 8 | 1.5E-04 | COL3A1, COL5A3, ANKRD1, PKP2, BGN, COL4A5, COL9A2, MYH7 |
| mmu04974 | Protein digestion and absorption | 6 | 2.0E-04 | COL3A1, COL14A1, COL22A1, COL5A3, COL4A5, COL9A2 |
| mmu04933 | AGE-RAGE signaling pathway in diabetic complications | 4 | 1.4E-02 | TGFB2, COL3A1, MMP2, COL4A5 |
| mmu04115 | p53 signaling pathway | 3 | 5.5E-02 | PERP, CYCT, BCL2L1 |
| mmu05410 | Hypertrophic cardiomyopathy | 3 | 9.0E-02 | TGFB2, ACE, MYH7 |
| mmu05415 | Diabetic cardiomyopathy | 4 | 2.0E-02 | TGFB2, COL3A1, ACE, MMP2 |

**Supplemental Table 6.** Comparison of k4 for DOX and control groups imaged at 4 weeks or 16 weeks after initial exposure to doxorubicin or saline. Data are presented as mean ± standard deviation. Statistical comparisons were performed by one-way ANOVA. Group sizes are indicated in parenthesis.

| 4 Weeks | DOX | 0.998 ± 0.989 (n = 8) | p = 0.457 |
| --- | --- | --- | --- |
| Control | 1.785 ± 1.133 (n = 7) |
| 16 Weeks | DOX | 1.383 ± 0.999 (n = 8) | p = 0.352 |
| Control | 2.322 ± 0.635 (n = 4) |

**Supplemental Table 7.** Comparison of the kinetic constants derived for the four groups using 2 tissue, 4 parameter kinetic modeling. Data are presented as mean ± standard deviation. Statistical comparisons were performed by one-way ANOVA.

| 4 Weeks | VA (mL/mL) | DOX | 0.923 ± 0.0400 | p = 0.187 |
| --- | --- | --- | --- | --- |
| Control | 0.841 ± 0.115 |
| K1 (mL/(mL*min)) | DOX | 4.895 ± 2.968 | p = 0.910 |
| Control | 4.173 ± 1.071 |
| k2 (/min) | DOX | 2.689 ± 0.777 | p = 0.988 |
| Control | 2.816 ± 0.452 |
| k3 (/min) | DOX | 0.210 ± 0.313 | p = 0.626 |
| Control | 0.440 ± 0.299 |
| 16 Weeks | VA (mL/mL) | DOX | 0.871 ± 0.0510 | p = 0.864 |
| Control | 0.904 ± 0.081 |
| K1 (mL/(mL*min)) | DOX | 3.078 ± 1.013 | p = 0.920 |
| Control | 3.809 ± 2.197 |
| k2 (/min) | DOX | 2.546 ± 0.741 | p > 0.999 |
| Control | 2.524 ± 0.871 |
| k3 (/min) | DOX | 0.589 ± 0.376 | p = 0.871 |
| Control | 0.437 ± 0.425 |

**Supplemental Table 8.** Summary of target and housekeeping proteins for Western blot

| **Antibody name** | **Abbreviation** | **Dilution** | **Catalog #** | **Company** |
| --- | --- | --- | --- | --- |
| - Primary | | | | |
| MPC1 (D2L9I) Rabbit mAb | MPC1 | 1:1000 | 14462 | Cell Signaling Technology, USA |
| MPC2 (D4I7G) Rabbit mAb | MPC2 | 1:1000 | 46141 | Cell Signaling Technology, USA |
| MCT1 Monoclonal Antibody (P14612) | MCT1 | 1:500 | MA5-18288 | Thermo Fisher, USA |
| MCT4 SLC16A3 Antibody | MCT4 | 1:500 | A05510 | Boster Biological Technology |
| LDHA (C4B5) Rabbit mAb | LDHA | 1:1000 | 3582S | Cell Signaling Technology, USA |
| LDHB Polyclonal antibody | LDHB | 1:1000 | 14824-1-AP | Proteintech, USA |
| GPT (E-3), glutamate pyruvate transaminases GPT, also designated  alanine aminotransferases (ALT) | ALT | 1:500 | sc-374501 | Santa Cruz, USA |
| PDH Antibody Cocktail | PDH complex | 1:500 | 45-6799 | ThermoFisher, USA |
| p53 | p53 | 1:500 | sc-393031 | Santa Cruz, USA |
| p21 | p21 | 1:500 | sc-6246 | Santa Cruz, USA |
| Heat shock protein family D member 1 | HSP60 | 1:1000 | 12165 | Cell Signaling Technology, USA |
| Vinculin | Vinculin | 1:1000 | 4650 | Cell Signaling Technology, USA |
|  |  |  |  |  |
| - Secondary |  |  |  |  |
| Anti-mouse IgG, HRP-linked Antibody | Anti-mouse | 1:2000 | 7076 | Cell Signaling Technology, USA |
| Anti-rabbit IgG, HRP-linked Antibody | Anti-rabbit | 1:2000 | 7074 | Cell Signaling Technology, USA |
